# Supplementary material
Source: PubMed Central journal article supplement (PMC3943971)
Supplement: NIHMS552581-supplement-1.pdf [file NIHMS552581-supplement-1.pdf]

## Supplemental Table 1

### Primers for bisulfate converted promoter region of the human NOS2 region

|               | Primer                     | Location *             | Assays               |
|---------------|----------------------------|------------------------|----------------------|
| Human 1 Outer | ATTGTATTTTAGGTATTATAAGGAA  | Forward -1071 to -1048 | Bisulfite Sequencing |
|               | TTTTTAAAATAAAATCTCATTCTATC | Reverse -748 to -772   |                      |
| Inner         | AGGTATTATAAGGAATGAAATTATA  | Forward -1061 to -1037 | Bisulfite Sequencing |
|               | TAAAATCTCATTCTATCACCAAAA   | Reverse -757 to -780   |                      |
| Human 2 Outer | TTGTTGAGGAAAAAATTTTTAGAT   | Forward -358 to -334   | Bisulfite Sequencing |
|               | TTTCTAATCCCAAATCCAAAATAA   | Reverse -225 to -248   |                      |
| Inner         | AAAAATTTTTAGATGTTGAAAGTG   | Forward -348 to -324   | Bisulfite Sequencing |
|               | AAATCCAAAATAACAATTCATCAA   | Reverse -236 to -259   |                      |
| Human 3 Outer | GTATAAATTTTTTTGGTTGTTAGT   | Forward -31 to -7      | Bisulfite Sequencing |
|               | AAAAAATCCCACAATTTTCTAAA    | Reverse +283 to +260   |                      |
| Inner         | GGTTGTTAGTGTGTTTATAATTTT   | Forward -16 to +8      | Bisulfite Sequencing |
|               | CAATTTTCTAAACCTTCTCAAAA    | Reverse +271 to +248   |                      |

Primers for bisulfite-converted promoter region of the human NOS2 gene

\*Location relative to the beginning of the 1st exon

### Primers for bisulfate converted promoter region of the mouse NOS2 region

|               | Primer                      | Location *           | Assays               |
|---------------|-----------------------------|----------------------|----------------------|
| Mouse 1 Outer | GTAAATATTTTATTTTATAATGGAAA  | Forward -962 to -937 | Bisulfite Sequencing |
|               | TAAAATTATAATATCCTACCTAAATA  | Reverse -706 to 731  |                      |
| Inner         | ATAATGGAAAATTTTATGTTATGTG   | Forward -945 to -921 | Bisulfite Sequencing |
|               | TACCTAAATATAATAACATAAACCT   | Reverse -722 to -746 |                      |
| Mouse 2 Outer | TTAGTATAGTTTATTATTATTTTGT   | Forward -554 to -528 | Bisulfite Sequencing |
|               | CCTAACTTACAACCTACTAAAAAAT   | Reverse -321 to -345 |                      |
| Inner         | ATTATTTTGTAAAGTTGATTATTA    | Forward -537 to -512 | Bisulfite Sequencing |
|               | TTACAACCTACTAAAAAATTTTATTCT | Reverse -328 to -353 |                      |
| Mouse 3 Outer | AGAATAAAATTTTTAGTAGTTGTAA   | Forward -353 to -328 | Bisulfite Sequencing |
|               | ACTTAATTACATCACTCTATAATAT   | Reverse -170 to -194 |                      |
| Inner         | ATTTTTTAGTAGTTGTAAGTTAGG    | Forward -345 to -321 | Bisulfite Sequencing |
|               | TCTATAATATATCCTCATACAAAA    | Reverse -184 to -208 |                      |
| Mouse 4 Outer | TTGTTAGGGTTATAATTTTATAGG    | Forward -44 to -20   | Bisulfite Sequencing |
|               | TAAACTTTCCCAAACAAAAAACA     | Reverse 196 to 173   |                      |
| Inner         | TATAATTTTATAGGGAGTTGAAGA    | Forward -34 to -11   | Bisulfite Sequencing |
|               | AACAAAAAACACTCCTAAAAACA     | Reverse 184 to 161   |                      |
| Mouse 5 Outer | AAGGTGTAAGAAGTATATTTATAG    | Forward 265 to 287   | Bisulfite Sequencing |
|               | ATCTTATCAAATCTAAATAAAACAAA  | Reverse 480 to 455   |                      |
| Inner         | TAAGAAGTATATTTATAGAAGGGT    | Forward 271 to 294   | Bisulfite Sequencing |
|               | TCTAAATAAAACAAAAACACATCT    | Reverse 464 to 445   |                      |

Primers for bisulfite-converted promoter region of the murine NOS2 gene

\*Location relative to the beginning of the 1st exon

## Supplemental Table 2

### Primers for mouse chromatin accessibility and ChIP assays

| Gene         | Primer                    | Location *             | Assays                        |
|--------------|---------------------------|------------------------|-------------------------------|
| NOS2         | CCACTATTCTGCCCAAGCTGACT   | Forward -541 to -516   | ChIP, Chromatin Accessibility |
|              | ATGGTGCCAATATTCCAACACGCC  | Reverse -425 to -401   |                               |
|              | AGGAGTGTCTTCTGCTGGGAAA    | Forward +167 to +191   | ChIP, Chromatin Accessibility |
|              | TGGGTGTGCTTCTTACACCTTCCA  | Reverse +262 to +286   |                               |
| ICAM1        | GAAATACCGAAGCCCTCGTTC     | Forward -103 to -82    | ChIP, Chromatin Accessibility |
|              | TAGCACTGGGTGCAGACT        | Reverse +15 to +33     |                               |
| HBB          | GACCCAGCGGTACTTTGATA      | Forward +284 to +303   | ChIP, Chromatin Accessibility |
|              | GGCAGTTATCACTTCTTGCC      | Reverse +362 to +383   |                               |
| TNF $\alpha$ | GATGGAGAAGAAACCGAGACAG    | Forward -170 to -151   | ChIP, Chromatin Accessibility |
|              | CTCTCATTCAACCCTCGGAAA     | Reverse -88 to -68     |                               |
| GAPDH        | TCTCTGCTCCTCCCTGTT        | Forward -20 to -3      | ChIP, Chromatin Accessibility |
|              | CTTCCCAGTTTCCGACTGT       | Reverse +67 to +86     |                               |
|              | TTCCACTCTGAAGAACATGAGATAG | Forward +2059 to +2083 | ChIP, Chromatin Accessibility |
|              | CCAATACGGCCAAATCTGAAAG    | Reverse +2141 to +2162 |                               |

### Primers for human chromatin accessibility and ChIP assays

| Gene         | Primer                    | Location *           | Assays                        |
|--------------|---------------------------|----------------------|-------------------------------|
| NOS2         | GGCCATGTGGCTTGCCAAATAAAA  | Forward -322 to -297 | ChIP, Chromatin Accessibility |
|              | ATCACTCTGTGTGGTGCCTCTTCA  | Reverse -211 to -187 |                               |
|              | CAGAGAACTCAGCCTCATTCC     | Forward +38 to +59   | ChIP                          |
|              | TGAGAACTTCGGGACTGTCTA     | Reverse +107 to +128 |                               |
|              | GACAGTCCCGAAGTTCTCAA      | Forward +109 to +130 | ChIP, Chromatin Accessibility |
|              | CCAGAAATGAAGGCAACTCAC     | Reverse +192 to +212 |                               |
| ICAM1        | CCTGGAGTCTCAGTTTACCGCTTT  | Forward -119 to -95  | ChIP, Chromatin Accessibility |
|              | CAGGCTAAGCTTGAATCACGGTCT  | Reverse -11 to -13   |                               |
| HBB          | ATATCTTAGAGGGAGGGCTGAG    | Forward -198 to -176 | Chromatin Accessibility       |
|              | AGGGTGAGGTCTAAGTGATGA     | Reverse -118 to -99  |                               |
|              | CAAGGTGAACGTGGATGAAGT     | Forward +51 to +72   | ChIP                          |
|              | CTCCACATGCCAGTTTCTATT     | Reverse +180 to +201 |                               |
| TNF $\alpha$ | GGACACCATGAGCACTGAAA      | Forward +163 to +183 | ChIP, Chromatin Accessibility |
|              | AAGGAGAAGAGGCTGAGGAA      | Reverse 263 to 283   |                               |
| GAPDH        | CAGTCAGCCGCATCTTCTTT      | Forward +23 to +47   | ChIP                          |
|              | CCTTCAGGCCGTCCTTA         | Reverse +103 to +130 |                               |
|              | CGGGAGGCGGGTCCGAGTACCCGC  | Forward +88 to +105  | Chromatin Accessibility       |
|              | GGCTGACTGTGCAACAGGAGGAGCA | Reverse +154 to +172 |                               |
